# Supplementary material for: Diet Diversity of the Fluviatile Masu Salmon, Oncorhynchus masou (Brevoort 1856) Revealed via Gastrointestinal Environmental DNA Metabarcoding and Morphological Identification of Contents
Source: MDPI journal article supplement (doi:10.3390/biology13020129), 2024-02-18
Supplement: s1 [file s1]

---

Supplemental Information for:

# Diet diversity of the fluviatile masu salmon revealed by gastrointestinal tract environmental DNA metabarcoding and contents morphological identification

Lijuan Li <sup>1</sup>, Xuwang Yin <sup>2</sup>, Qianruo Wan <sup>1</sup>, Dilina Rusitanmu <sup>1</sup> and Jie Han <sup>1,\*</sup>

<sup>1</sup> Ministry of Education Key Laboratory for Biodiversity Science and Ecological Engineering, College of Life Sciences, Beijing Normal University, No. 19 XinJieKouWai Avenue, Beijing 100875, P.R. China

<sup>2</sup> Liaoning Provincial Key Laboratory for Hydrobiology, College of Fisheries and Life Science, Dalian Ocean University, NO. 52 HeiShiJiao Avenue, Dalian 116000, P.R. China

\* Correspondence: jiehan@bnu.edu.cn

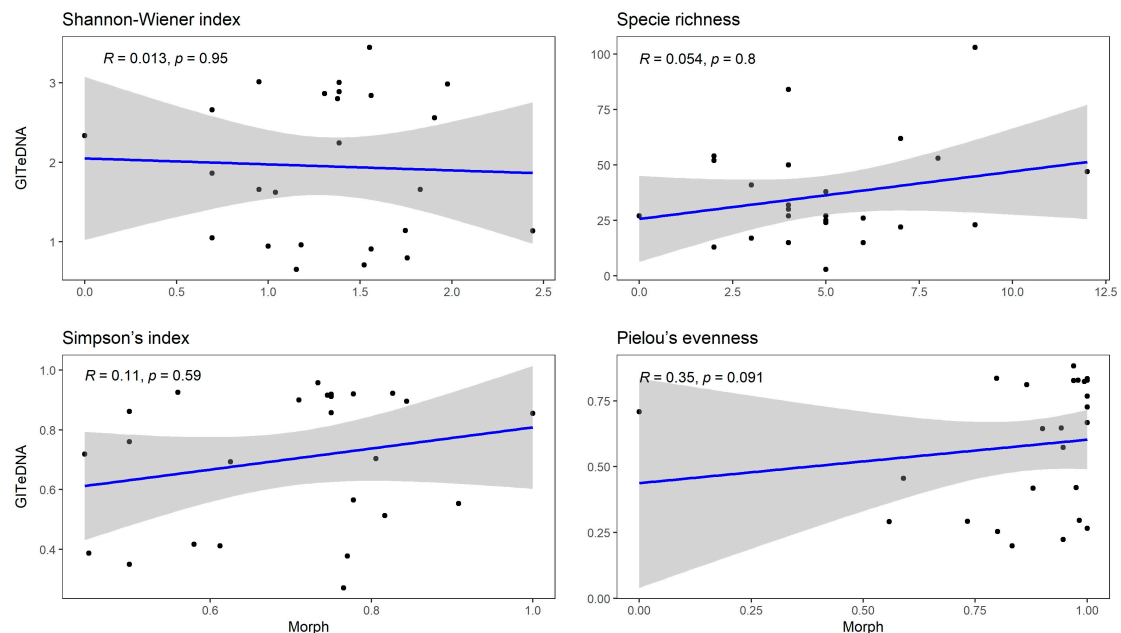

**Figure S1** Correlations between diet diversity indices obtained from morphological observation and GITeDNA metabarcoding ( $n=24$ ).

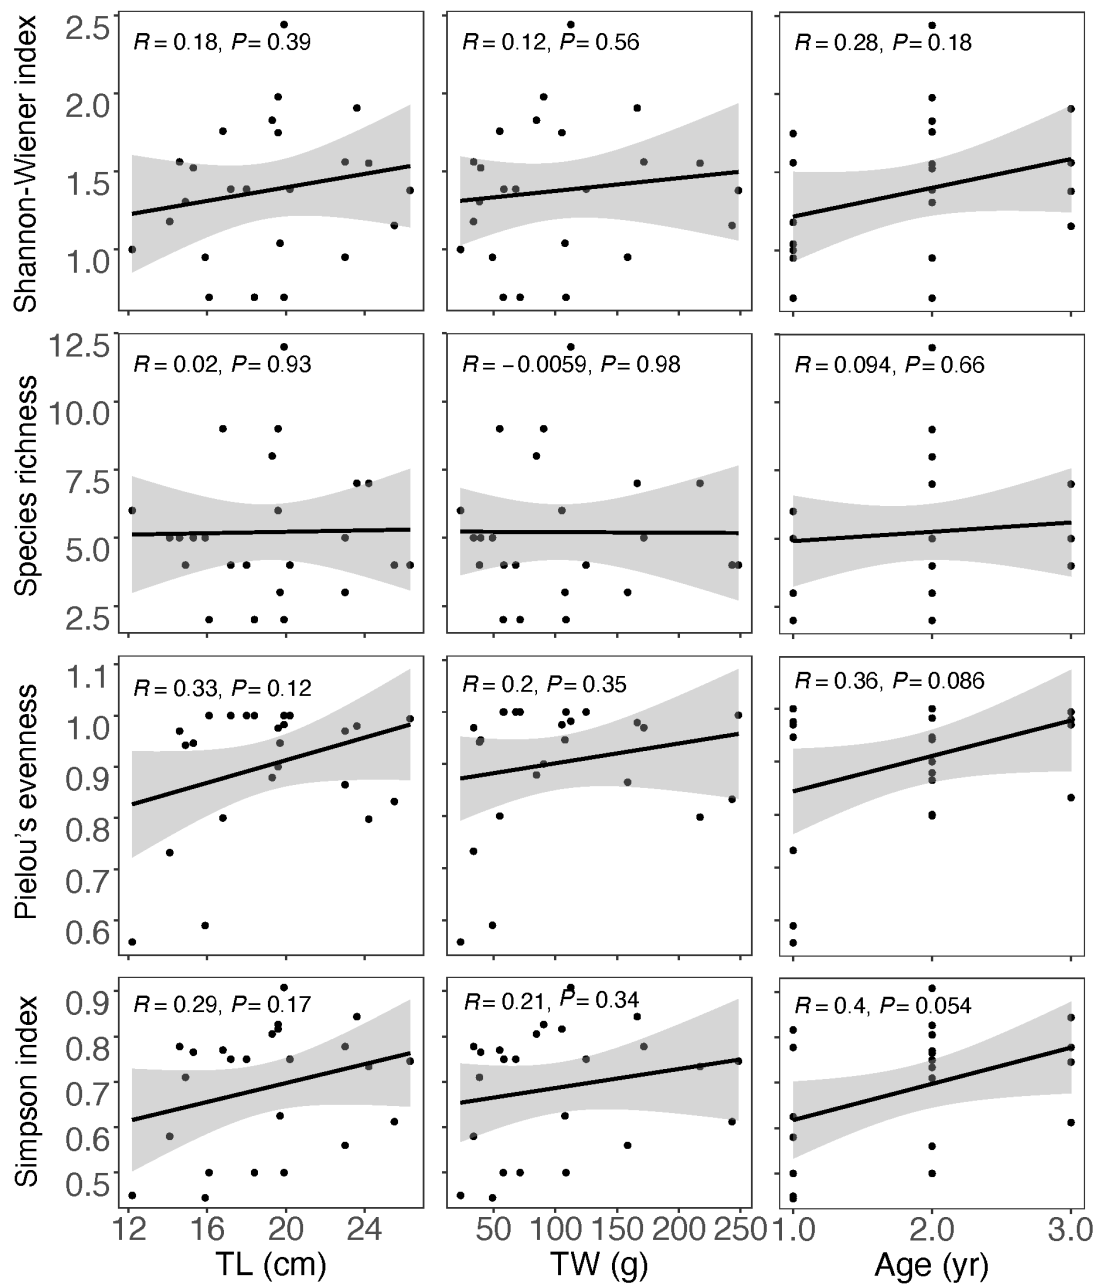

**Figure S2** Correlations between body size, age and diet diversity indices of Masu salmon calculated using morphological observation data (TL, total length; TW, total weight;  $n=24$ ).

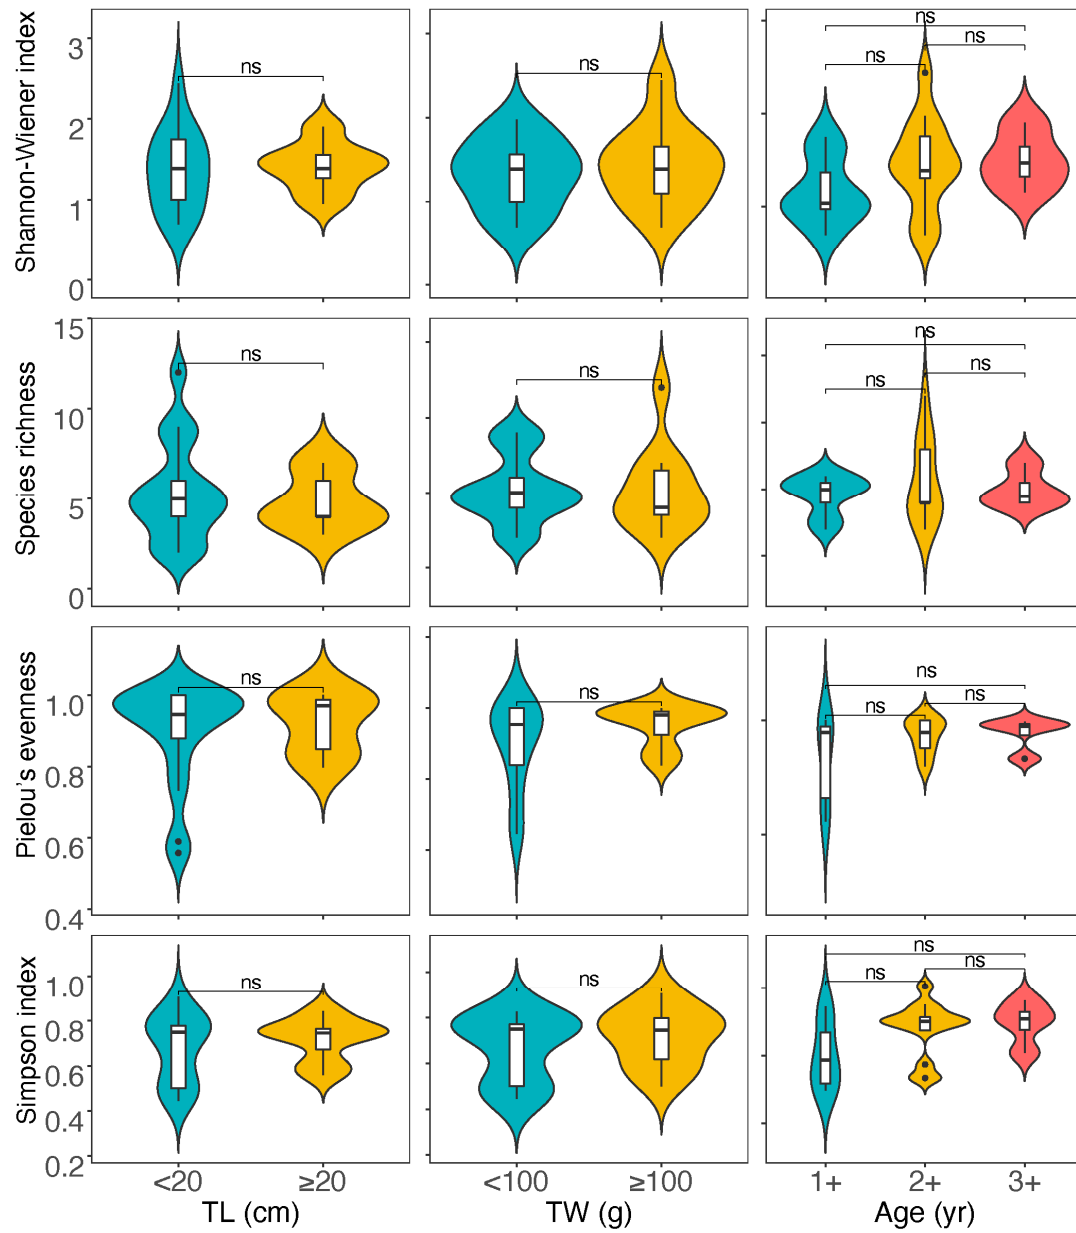

**Figure S3** Comparison of diet diversity indices of different size and age groups of Masu salmon (TL, total length; TW, total weight; <sup>ns</sup>  $P \geq 0.05$ ;  $n=24$ ).

---

## Supplementary Tables

**Table S1** Oligo DNA tags attached to the PCR primers which amplifying metabarcode of Masu salmon gastrointestinal tract environmental DNA (GITeDNA).

|          |          |          |
|----------|----------|----------|
| ccaatgaa | cctgacca | ccatgtca |
| cccgaatc | ccacagtg | ccgtagag |
| ccagagac | ccgccaat | ccgtccgc |
| ccttcgga | cccagatc | ccgtgaac |
| cccgacgt | ccacgtga | ccgtttcg |
| ccctcatg | ccgatcag | cccgtacg |
| cctgtata | cctagctt | ccgagtgg |
| ccatcacg | ccctggta | ccggtagc |
| ccctatgt | ccagtcaa | ccactgat |
| ccttaggc | ccagttcc | ccatgagc |
| ccattcct |          |          |

**Table S2** Types of prey and their frequencies of the fluviatile Masu salmon based on data from morphological observation (Morph) and GITEDNA metabarcoding.

| Phylum     | Class      | Order            | Family          | Genus               | Species                           | T / A | Frequency of occurrence |              |
|------------|------------|------------------|-----------------|---------------------|-----------------------------------|-------|-------------------------|--------------|
|            |            |                  |                 |                     |                                   |       | Morph (%)               | GITE DNA (%) |
| Annelida   | Clitellata | Arhynchobdellida | Haemopidae      | <i>Haemopsis</i>    | spp.*                             | A     | 0.336                   | 8.311        |
|            |            |                  | Lumbricidae     | <i>Dendrodrilus</i> | <i>Dendrodrilus rubidus</i>       | T     | -                       | 0.028        |
|            |            |                  | Rhynchobdellida |                     | sp.                               | A     | -                       | 0.014        |
| Arthropoda | Arachnida  | Araneae          |                 |                     | spp.                              | T     | 0.671                   | 0.016        |
|            |            |                  |                 |                     | sp.                               | T     | -                       | 0.041        |
|            |            |                  | Dictynidae      |                     | sp.                               | T     | -                       | 0.005        |
|            |            |                  | Philodromidae   | <i>Philodromus</i>  | <i>Philodromus cespitum</i>       | T     | -                       | 3.316        |
|            |            |                  | Sarcoptiformes  | Nanhermanniidae     | sp.                               | T     | -                       | 0.010        |
|            |            |                  | Trombidiformes  |                     | sp.                               | T     | -                       | 0.110        |
|            |            |                  | Pionidae        |                     | sp.                               | T     | -                       | 0.009        |
|            |            | Coleoptera       |                 |                     | spp.                              | T     | 1.007                   | 0.227        |
|            |            |                  | Cerambycidae    |                     | spp.                              | T     | 1.007                   | 0.069        |
|            |            |                  | Cerambycidae    | <i>Leptura</i>      | sp.                               | T     | -                       | 0.016        |
|            |            |                  | Cerambycidae    | <i>Leptura</i>      | <i>leptura ochraceofasciata</i>   | T     | 0.671                   | -            |
|            |            |                  | Chrysomelidae   |                     | spp.                              | T     | 1.007                   | 0.473        |
|            |            |                  | Chrysomelidae   | <i>Chrysomela</i>   | sp.                               | T     | -                       | 0.034        |
|            |            |                  | Chrysomelidae   | <i>Chrysomela</i>   | <i>Chrysomela vigintipunctata</i> | T     | 0.336                   | 0.043        |
|            |            |                  | Chrysomelidae   | <i>Galerucella</i>  | sp.                               | T     | -                       | 0.118        |
|            |            |                  | Chrysomelidae   | <i>Phratora</i>     | <i>Phratora laticollis</i>        | T     | -                       | 0.006        |
|            |            |                  | Chrysomelidae   | <i>Plagiosterna</i> | <i>Plagiosterna aenea</i>         | T     | 1.678                   | 0.021        |
|            |            |                  | Coccinellidae   | <i>Chilocorus</i>   | sp.                               | T     | -                       | 0.114        |
|            |            |                  | Elateridae      | <i>Limoniscus</i>   | <i>Limoniscus violaceus</i>       | T     | -                       | 0.007        |
|            |            |                  | Scarabaeidae    |                     | spp.                              | T     | 0.336                   | -            |
|            |            |                  | Scarabaeidae    | <i>Anomala</i>      | <i>Anomala dubia</i>              | T     | -                       | 0.004        |
|            |            |                  | Spercheidae     | <i>Spercheus</i>    | sp.                               | A     | -                       | 0.406        |
|            |            | Diptera          |                 |                     | sp.                               | -     | -                       | 4.209        |
|            |            |                  | Calliphoridae   | <i>Lucilia</i>      | <i>Lucilia sericata</i>           | T     | -                       | 0.005        |
|            |            |                  | Calliphoridae   | <i>Protophormia</i> | <i>Protophormia terraenovae</i>   | T     | -                       | 0.015        |
|            |            |                  | Cecidomyiidae   |                     | sp.                               | T     | -                       | 0.021        |
|            |            |                  | Chironomidae    |                     | spp.                              | A     | 8.054                   | 0.664        |
|            |            |                  | Chironomidae    |                     | sp.                               | A     | -                       | 0.307        |
|            |            |                  | Chironomidae    | <i>Belgica</i>      | <i>Belgica antarctica</i>         | A     | -                       | 0.016        |

|                  |                               |                                        |   |       |       |
|------------------|-------------------------------|----------------------------------------|---|-------|-------|
| Chironomid<br>ae | <i>Cladotanyt<br/>arsus</i>   | sp.                                    | A | -     | 0.016 |
| Chironomid<br>ae | <i>Corynoneu<br/>ra</i>       | sp. 1                                  | A | -     | 0.009 |
| Chironomid<br>ae | <i>Corynoneu<br/>ra</i>       | sp. 2                                  | A | -     | 0.018 |
| Chironomid<br>ae | <i>Corynoneu<br/>ra</i>       | sp. 3                                  | A | -     | 0.810 |
| Chironomid<br>ae | <i>Cricotopus</i>             | sp. 1                                  | A | -     | 0.659 |
| Chironomid<br>ae | <i>Cricotopus</i>             | sp. 2                                  | A | -     | 5.732 |
| Chironomid<br>ae | <i>Cricotopus</i>             | <i>Cricotopus<br/>annulator</i>        | A | -     | 0.009 |
| Chironomid<br>ae | <i>Cricotopus</i>             | <i>Cricotopus<br/>bicinctus</i>        | A | -     | 0.006 |
| Chironomid<br>ae | <i>Cricotopus</i>             | <i>Cricotopus<br/>perniger</i>         | A | -     | 0.373 |
| Chironomid<br>ae | <i>Cricotopus</i>             | <i>Cricotopus<br/>rufiventris</i>      | A | -     | 0.003 |
| Chironomid<br>ae | <i>Cricotopus</i>             | <i>Cricotopus<br/>sylvestris</i>       | A | -     | 0.007 |
| Chironomid<br>ae | <i>Cricotopus</i>             | <i>Cricotopus<br/>tremulus</i>         | A | -     | 0.083 |
| Chironomid<br>ae | <i>Cricotopus</i>             | <i>Cricotopus<br/>triannulatus</i>     | A | -     | 0.079 |
| Chironomid<br>ae | <i>Diamesa</i>                | sp. 1                                  | A | -     | 0.130 |
| Chironomid<br>ae | <i>Diamesa</i>                | sp. 2                                  | A | -     | 0.003 |
| Chironomid<br>ae | <i>Gymnomet<br/>riocnemus</i> | <i>Gymnometriocne<br/>mus brumalis</i> | A | -     | 0.027 |
| Chironomid<br>ae | <i>Halocladiu<br/>s</i>       | <i>Halocladius<br/>variabilis</i>      | A | -     | 0.002 |
| Chironomid<br>ae | <i>Micropsect<br/>ra</i>      | <i>Micropsectra<br/>lacustris</i>      | A | -     | 0.010 |
| Chironomid<br>ae | <i>Micropsect<br/>ra</i>      | <i>Micropsectra<br/>logani</i>         | A | -     | 0.077 |
| Chironomid<br>ae | <i>Nanocladi<br/>us</i>       | sp.                                    | A | -     | 1.064 |
| Chironomid<br>ae | <i>Orthocladi<br/>us</i>      | spp.*                                  | A | 9.396 | 0.012 |
| Chironomid<br>ae | <i>Orthocladi<br/>us</i>      | <i>Orthocladius<br/>oliveri</i>        | A | -     | 0.109 |
| Chironomid<br>ae | <i>Orthocladi<br/>us</i>      | sp.                                    | A | -     | 0.383 |
| Chironomid<br>ae | <i>Pagastia</i>               | <i>Pagastia<br/>orthogonia</i>         | A | -     | 0.006 |
| Chironomid<br>ae | <i>Phaenopse<br/>ctra</i>     | sp.                                    | A | -     | 0.021 |
| Chironomid<br>ae | <i>Polypedilu<br/>m</i>       | sp. 1                                  | A | -     | 0.009 |
| Chironomid<br>ae | <i>Polypedilu<br/>m</i>       | sp. 2                                  | A | -     | 2.594 |
| Chironomid<br>ae | <i>Polypedilu<br/>m</i>       | <i>Polypedilum<br/>albicorne</i>       | A | -     | 0.187 |
| Chironomid<br>ae | <i>Rheocricot<br/>opus</i>    | <i>Rheocricotopus<br/>effusus</i>      | A | -     | 0.037 |
| Chironomid<br>ae | <i>Saetheria</i>              | sp.                                    | A | -     | 0.098 |
| Chironomid<br>ae | <i>Tanytarsus</i>             | sp. 1                                  | A | -     | 0.139 |
| Chironomid<br>ae | <i>Tanytarsus</i>             | sp. 2                                  | A | -     | 0.014 |
| Chloropida<br>e  | <i>Elachipter<br/>a</i>       | sp.                                    | T | -     | 0.421 |
| Culicidae        | <i>Culex</i>                  | spp.                                   | A | 6.711 | -     |

|               |                 |                          |                                 |   |       |        |
|---------------|-----------------|--------------------------|---------------------------------|---|-------|--------|
|               | Culicidae       | <i>Culex</i>             | <i>Culex pipiens</i>            | A | -     | 0.056  |
|               | Dolichopodidae  | <i>Dolichopods</i>       | sp.                             | T | -     | 0.093  |
|               | Drosophilidae   |                          | sp.                             | T | -     | 0.038  |
|               | Drosophilidae   | <i>Drosophila</i>        | sp.                             | T | -     | 0.100  |
|               | Drosophilidae   | <i>Scaptomyza</i>        | <i>Scaptomyza pallida</i>       | T | -     | 0.007  |
|               | Empididae       |                          | sp. 1                           | A | -     | 0.080  |
|               | Empididae       |                          | sp. 2                           | A | -     | 0.058  |
|               | Empididae       | <i>Rhamphomyia</i>       | sp.                             | A | -     | 0.022  |
|               | Muscidae        |                          | sp.                             | T | -     | 0.002  |
|               | Muscidae        | <i>Helina</i>            | sp.                             | T | -     | 0.373  |
|               | Muscidae        | <i>Limnophora</i>        | sp.                             | T | -     | 0.019  |
|               | Mycetophilidae  | <i>Mycetophila</i>       | <i>Mycetophila strigatoides</i> | T | -     | 0.014  |
|               | Phoridae        |                          | sp.                             | T | -     | 0.002  |
|               | Psychodidae     | <i>Lutzomyia</i>         | <i>Lutzomyia anduzei</i>        | T | -     | 9.098  |
|               | Sciaridae       |                          | sp.                             | T | -     | 0.016  |
|               | Simuliidae      | <i>Simulium</i>          | spp.*                           | A | 6.376 | 4.304  |
|               | Simuliidae      | <i>Simulium</i>          | sp.                             | A | -     | 0.362  |
|               | Stratiomyidae   |                          | spp.                            | A | 1.342 | -      |
|               | Tabanidae       |                          | sp.                             | A | -     | 0.004  |
|               | Tabanidae       | <i>Chrysops</i>          | sp.                             | A | -     | 0.004  |
|               | Tabanidae       | <i>Hybomitra</i>         | <i>Hybomitra lasiophthalma</i>  | A | -     | 0.021  |
|               | Tachinidae      |                          | sp.                             | T | -     | 0.004  |
|               | Tachinidae      | <i>Medina</i>            | sp.                             | T | -     | 0.012  |
|               | Tachinidae      | <i>Trichopoda</i>        | sp.                             | T | -     | 0.003  |
|               | Tephritidae     | <i>Anastrepha</i>        | sp.                             | T | -     | 0.007  |
|               | Tephritidae     | <i>Anastrepha</i>        | <i>Anastrepha obliqua</i>       | T | -     | 0.130  |
|               | Tephritidae     | <i>Rhagoletis</i>        | sp.                             | T | -     | 0.009  |
|               | Tipulidae       | <i>Tipula</i>            | sp.                             | A | -     | 0.008  |
| Ephemeroptera |                 |                          | spp.                            | A | 5.034 | 0.187  |
|               | Baetidae        |                          | sp.                             | A | -     | 0.002  |
|               | Baetidae        | <i>Baetis</i>            | <i>Baetis phoebus</i>           | A | -     | 0.022  |
|               | Ephemerellidae  |                          | spp.                            | A | 2.013 | -      |
|               | Ephemerellidae  | <i>Ephemerella</i>       | <i>Ephemerella dorothea</i>     | A | -     | 0.002  |
|               | Ephemerellidae  | <i>Drunella</i>          | <i>drunella trispina</i>        | A | 0.336 | -      |
|               | Ephemerellidae  | <i>Serratella</i>        | spp.                            | A | 1.007 | -      |
|               | Ephemerellidae  | <i>Serratella</i>        | <i>Serratella ignita</i>        | A | -     | 0.015  |
|               | Heptageniidae   | <i>Epeorus</i>           | sp.                             | A | -     | 0.010  |
|               | Heptageniidae   | <i>Rhithrogena</i>       | sp.                             | A | 0.336 | 0.014  |
|               | Leptophlebiidae | <i>Austrophlebioides</i> | sp.                             | A | -     | 0.044  |
|               | Potamanthidae   | <i>Potamanthus</i>       | <i>Potamanthus tongitibius</i>  | A | 5.369 | 15.759 |
| Hemipter      |                 |                          | spp.                            | T | 0.671 | -      |

|   |                |                      |                               |   |        |        |
|---|----------------|----------------------|-------------------------------|---|--------|--------|
| a | Aphrophoridae  | <i>Aphrophora</i>    | spp.*                         | T | 1.678  | 1.018  |
|   | Aphrophoridae  | <i>Aphrophora</i>    | sp.                           | T | -      | 0.357  |
|   | Miridae        |                      | spp.                          | T | 0.336  | -      |
|   | Miridae        | <i>Poecilocapsus</i> | <i>Poecilocapsus lineatus</i> | T | -      | 0.077  |
|   | Pentatomidae   |                      | spp.                          | T | 1.007  | 0.037  |
|   | Hymenoptera    |                      | sp.                           | T | -      | 0.006  |
|   | Braconidae     | <i>Lytopylus</i>     | sp.                           | T | -      | 0.004  |
|   | Cimbicidae     |                      | sp.                           | T | -      | 0.004  |
|   | Formicidae     | <i>Lasius</i>        | sp.                           | T | -      | 0.183  |
|   | Formicidae     | <i>Lasius</i>        | <i>Lasius niger</i>           | T | 16.443 | 0.982  |
|   | Ichneumonidae  |                      | spp.                          | T | 3.691  | 0.006  |
|   | Lepidoptera    |                      | sp.                           | T | -      | 10.241 |
|   | Depressariidae | <i>Agonopterix</i>   | sp.                           | T | -      | 0.281  |
|   | Erebidae       |                      | sp. 1                         | T | -      | 0.207  |
|   | Erebidae       |                      | sp. 2                         | T | -      | 0.009  |
|   | Erebidae       | <i>Catocala</i>      | sp.                           | T | -      | 0.004  |
|   | Gelechiidae    | <i>Ardozyga</i>      | sp.                           | T | -      | 0.022  |
|   | Geometridae    |                      | sp.                           | T | -      | 2.861  |
|   | Nymphulinae    |                      | spp.                          | A | 0.336  | -      |
|   | Oecophoridae   |                      | sp.                           | T | -      | 0.034  |
| a | Sphingidae     |                      | spp.                          | T | 0.336  | 11.006 |
|   | Sphingidae     | <i>Amphion</i>       | <i>Amphion floridensis</i>    | T | -      | 0.033  |
|   | Sphingidae     | <i>Hemaris</i>       | <i>Hemaris fuciformis</i>     | T | -      | 0.017  |
|   | Sphingidae     | <i>Smerinthus</i>    | sp.                           | T | -      | 0.004  |
|   | Sphingidae     | <i>Smerinthus</i>    | <i>Smerinthus cerisyi</i>     | T | -      | 0.045  |
|   | Mecoptera      |                      | sp.                           | T | -      | 0.007  |
|   | Odonata        |                      | spp.                          | A | 0.671  | 2.244  |
|   | Gomphidae      | <i>Gomphidae</i>     | <i>nihonogomphus ruptus</i>   | A | 0.336  | -      |
|   | Coenagrionidae |                      | sp.                           | A | -      | 0.237  |
|   | Orthoptera     | Acrididae            | spp.                          | T | 0.671  | 0.009  |
|   | Plecoptera     |                      | spp.                          | A | 1.007  | 0.005  |
|   | Plecoptera     |                      | sp.                           | A | -      | 0.135  |
|   | Capniidae      |                      | sp.                           | A | -      | 0.141  |
|   | Perlodidae     |                      | spp.                          | A | 0.671  | -      |
|   | Perlodidae     | <i>Arcynopteryx</i>  | <i>Arcynopteryx compacta</i>  | A | -      | 0.005  |
|   | Perlodidae     | <i>Isoperla</i>      | spp.*                         | A | 2.013  | 0.013  |
|   | Perlodidae     | <i>Megarcys</i>      | <i>Megarcys watertoni</i>     | A | -      | 0.228  |
|   | Perlodidae     | <i>Skwala</i>        | sp.                           | A | -      | 0.178  |
|   | Pteronarcyidae | <i>Pteronarcys</i>   | spp.*                         | A | 5.369  | 0.007  |
|   | Taeniopteryx   | <i>Taenionem</i>     | spp.*                         | A | 0.336  | 0.059  |



|          |                |               |  |             |                 |                      |                           |   |       |       |
|----------|----------------|---------------|--|-------------|-----------------|----------------------|---------------------------|---|-------|-------|
|          |                |               |  | Trichoptera | gidae           | <i>a</i>             | spp.                      | A | 2.349 | 0.039 |
|          |                |               |  |             | Brachycentridae | <i>Brachycentrus</i> | sp.                       | A | -     | 0.004 |
|          |                |               |  |             | Glossosomatidae | <i>Glossosoma</i>    | sp.                       | A | -     | 0.261 |
|          |                |               |  |             | Goeridae        | <i>Goera</i>         | sp.                       | A | -     | 0.147 |
|          |                |               |  |             | Hydropsychidae  | <i>Hydropsyche</i>   | spp.*                     | A | 0.336 | 0.150 |
|          |                |               |  |             | Limnephilidae   |                      | sp.                       | A | -     | 0.027 |
|          |                |               |  |             | Phryganeidae    | <i>Agrypnia</i>      | <i>Agrypnia colorata</i>  | A | -     | 5.450 |
|          |                |               |  |             | Stenopsychidae  | <i>Stenopsyche</i>   | spp.*                     | A | 0.336 | 0.184 |
| Chordata | Actinopterygii | Cypriniformes |  |             |                 |                      | spp.                      | A | 6.711 | -     |
|          |                |               |  |             | Cyprinidae      | <i>Phoxinus</i>      | <i>Phoxinus phoxinus</i>  | A | 0.671 | 0.026 |
|          |                |               |  |             | Cyprinidae      | <i>Rhynchocypris</i> | sp.                       | A | -     | 0.019 |
|          |                |               |  |             | Nemacheilidae   | <i>Barbatula</i>     | spp.*                     | A | 1.007 | 0.002 |
|          |                | Salmoniformes |  |             | Salmonidae      | <i>Brachymystax</i>  | sp.                       | A | -     | 0.304 |
|          |                |               |  |             | Salmonidae      | <i>Brachymystax</i>  | <i>Brachymystax lenok</i> | A | -     | 0.002 |

“sp.” and “spp.” stand for single and several unknown or not specified species, respectively.

“spp.\*” indicates that only one species identified by morphological observation which may be different from that identified by GITEDNA barcoding.

A, aquatic prey; T, terrestrial prey.

**Table S3** Diet diversity of the fluvial Masu salmon.

| Fish code | TW (g) | TL (cm) | Age (year+) | Debris RV (%) | Morphological observation |          |         |          | GITEDNA metabarcoding |          |         |          |
|-----------|--------|---------|-------------|---------------|---------------------------|----------|---------|----------|-----------------------|----------|---------|----------|
|           |        |         |             |               | Shannon                   | Richness | Simpson | Evenness | Shannon               | Richness | Simpson | Evenness |
| M2        | 171.6  | 23.0    | 3           | 3             | 1.561                     | 5        | 0.778   | 0.970    | 2.841                 | 25       | 0.921   | 0.883    |
| M3        | 178.3  | 22.9    | 3           | 10            | 0.000                     | 1        | 0.000   | NA       | 2.197                 | 28       | 0.830   | 0.659    |
| M4        | 108.6  | 19.9    | 2           | 5             | 0.693                     | 2        | 0.500   | 1.000    | 2.662                 | 54       | 0.862   | 0.667    |
| M6        | 84.7   | 19.3    | 2           | 40            | 1.828                     | 8        | 0.806   | 0.879    | 1.660                 | 53       | 0.704   | 0.418    |
| M7        | 166.3  | 23.6    | 3           | 25            | 1.906                     | 7        | 0.844   | 0.980    | 2.560                 | 22       | 0.896   | 0.828    |
| M8        | 243.1  | 25.5    | 3           | 13            | 1.154                     | 4        | 0.612   | 0.832    | 0.655                 | 27       | 0.412   | 0.199    |
| M9        | 124.9  | 20.2    | 2           | 15            | 1.386                     | 4        | 0.750   | 1.000    | 2.244                 | 15       | 0.858   | 0.829    |
| M10       | 107.8  | 19.7    | 1           | 60            | 1.040                     | 3        | 0.625   | 0.946    | 1.623                 | 17       | 0.693   | 0.573    |
| M11       | 214.9  | 23.3    | 2           | empty         | NA                        | NA       | NA      | NA       | 2.336                 | 27       | 0.855   | 0.709    |
| M13       | 90.5   | 19.6    | 2           | 30            | 1.977                     | 9        | 0.826   | 0.900    | 0.908                 | 3        | 0.565   | 0.826    |
| M14       | 33.9   | 14.6    | 1           | 20            | 1.561                     | 5        | 0.778   | 0.970    | 2.984                 | 103      | 0.923   | 0.644    |
| M15       | 158.5  | 23.0    | 2           | 10            | 0.950                     | 3        | 0.560   | 0.865    | 3.012                 | 41       | 0.925   | 0.811    |

|      |        |       |      |       |           |      |           |           |       |         |       |       |
|------|--------|-------|------|-------|-----------|------|-----------|-----------|-------|---------|-------|-------|
| M16  | 217.1  | 24.2  | 2    | 40    | 1.55<br>3 | 7    | 0.73<br>4 | 0.79<br>8 | 3.446 | 62      | 0.958 | 0.835 |
| M17  | 248.2  | 26.3  | 3    | 0     | 1.37<br>8 | 4    | 0.74<br>6 | 0.99<br>4 | 2.800 | 30      | 0.917 | 0.823 |
| M18  | 140.1  | 22.0  | 2    | 6     | 0.00<br>0 | 1    | 0.00<br>0 | NA        | 3.116 | 38      | 0.945 | 0.857 |
| M20  | 190.6  | 24.3  | 2    | 20    | 0.00<br>0 | 1    | 0.00<br>0 | NA        | 3.236 | 62      | 0.937 | 0.784 |
| M21  | 107.1  | 20.1  | 3    | 5     | 0.00<br>0 | 1    | 0.00<br>0 | NA        | 2.003 | 14      | 0.819 | 0.759 |
| M22  | 67.9   | 18.0  | 2    | 10    | 1.38<br>6 | 4    | 0.75<br>0 | 1.00<br>0 | 2.890 | 32      | 0.919 | 0.834 |
| M23  | 57.8   | 16.1  | 2    | 5     | 0.69<br>3 | 2    | 0.50<br>0 | 1.00<br>0 | 1.048 | 52      | 0.350 | 0.265 |
| M24  | 49.1   | 15.9  | 1    | 15    | 0.95<br>0 | 5    | 0.44<br>4 | 0.59<br>0 | 1.657 | 38      | 0.719 | 0.456 |
| M25  | 71.4   | 18.4  | 1    | 5     | 0.69<br>3 | 2    | 0.50<br>0 | 1.00<br>0 | 1.862 | 13      | 0.760 | 0.726 |
| M26  | 112.5  | 19.9  | 2    | 30    | 2.44<br>1 | 12   | 0.90<br>8 | 0.98<br>2 | 1.137 | 47      | 0.553 | 0.295 |
| M27  | 124.6  | 20.2  | 1    | 40    | 0.00<br>0 | 1    | 0.00<br>0 | NA        | 0.004 | 5       | 0.001 | 0.002 |
| M28  | 58.3   | 17.2  | 2    | 20    | 1.38<br>6 | 4    | 0.75<br>0 | 1.00<br>0 | 3.003 | 50      | 0.912 | 0.768 |
| M30  | 99.1   | 19.3  | 2    | 50    | 0.00<br>0 | 1    | 0.00<br>0 | NA        | 1.549 | 29      | 0.642 | 0.460 |
| M31  | 105.3  | 19.6  | 1    | 5     | 1.74<br>8 | 6    | 0.81<br>6 | 0.97<br>6 | 1.140 | 15      | 0.513 | 0.421 |
| M32  | 33.7   | 14.1  | 1    | 20    | 1.17<br>9 | 5    | 0.58<br>0 | 0.73<br>2 | 0.962 | 27      | 0.417 | 0.292 |
| M33  | 23.2   | 12.2  | 1    | 50    | 1.00<br>0 | 6    | 0.45<br>0 | 0.55<br>8 | 0.947 | 26      | 0.387 | 0.291 |
| M34  | 39.6   | 15.3  | 2    | 30    | 1.52<br>3 | 5    | 0.76<br>5 | 0.94<br>6 | 0.709 | 24      | 0.271 | 0.223 |
| M36  | 54.9   | 16.8  | 2    | 40    | 1.75<br>8 | 9    | 0.77<br>0 | 0.80<br>0 | 0.797 | 23      | 0.378 | 0.254 |
| M37  | 38.6   | 14.9  | 2    | 10    | 1.30<br>6 | 4    | 0.71<br>0 | 0.94<br>2 | 2.866 | 84      | 0.900 | 0.647 |
| Mean | 113.61 | 19.66 | 1.94 | 21.07 | 1.10      | 4.37 | 0.55      | 0.90      | 1.96± | 35.03±2 | 0.70± | 0.58± |
| ±sd  | ±64.93 | ±3.6  | ±0.6 | ±16.4 | ±0.6      | ±2.7 | ±0.3      | ±0.1      | 0.95  | 2.20    | 0.25  | 0.25  |

TW, total weight; TL, total length; RV, the relative volume of the debris to that of gastrointestinal tract.

**Table S4.** Diet diversity in the divided fluviatile Masu salmon groups.

| Data                 | Group  | n  | Shannon-Wiener index | Species richness | Pielou's evenness | Simpson index |
|----------------------|--------|----|----------------------|------------------|-------------------|---------------|
| GITeDNA<br>(Mean±sd) | <20 cm | 18 | 1.69±0.83            | 38.33±25.28      | 0.50±0.21         | 0.64±0.22     |
|                      | ≥20 cm | 13 | 2.34±1.00            | 30.46±16.95      | 0.69±0.27         | 0.79±0.28     |
|                      | <100 g | 14 | 1.70±0.88            | 39.79±27.05      | 0.51±0.23         | 0.63±0.24     |
|                      | ≥100 g | 17 | 2.18±0.97            | 31.12±17.12      | 0.64±0.26         | 0.76±0.26     |
|                      | age 1+ | 8  | 1.14±0.59            | 0.45±0.26        | 18.00±11.80       | 0.51±0.25     |
|                      | age 2+ | 17 | 2.28±0.93            | 0.61±0.23        | 46.82±22.73       | 0.76±0.23     |
|                      | age 3+ | 6  | 2.18±0.82            | 0.69±0.25        | 24.33±5.75        | 0.80±0.19     |
| Morph<br>(Mean±sd)   | <20cm  | 17 | 1.36±0.49            | 5.35±2.78        | 0.90±0.14         | 0.68±0.15     |
|                      | ≥20cm  | 7  | 1.41±0.31            | 4.86±1.57        | 0.92±0.09         | 0.72±0.10     |
|                      | <100g  | 13 | 1.33±0.41            | 5.23±2.28        | 0.87±0.16         | 0.66±0.15     |
|                      | ≥100g  | 11 | 1.44±0.49            | 5.18±2.79        | 0.94±0.07         | 0.72±0.13     |

---

|        |    |           |           |           |           |
|--------|----|-----------|-----------|-----------|-----------|
| age 1+ | 7  | 1.17±0.37 | 4.57±1.51 | 0.82±0.19 | 0.60±0.15 |
| age 2+ | 13 | 1.45±0.50 | 5.62±3.10 | 0.93±0.08 | 0.72±0.12 |
| age 3+ | 4  | 1.50±0.32 | 5.00±1.41 | 0.94±0.08 | 0.74±0.10 |

---
